# Supplementary material
Source: PubMed Central journal article supplement (PMC4107340)
Supplement: NIHMS604608-supplement-1.pdf [file NIHMS604608-supplement-1.pdf]

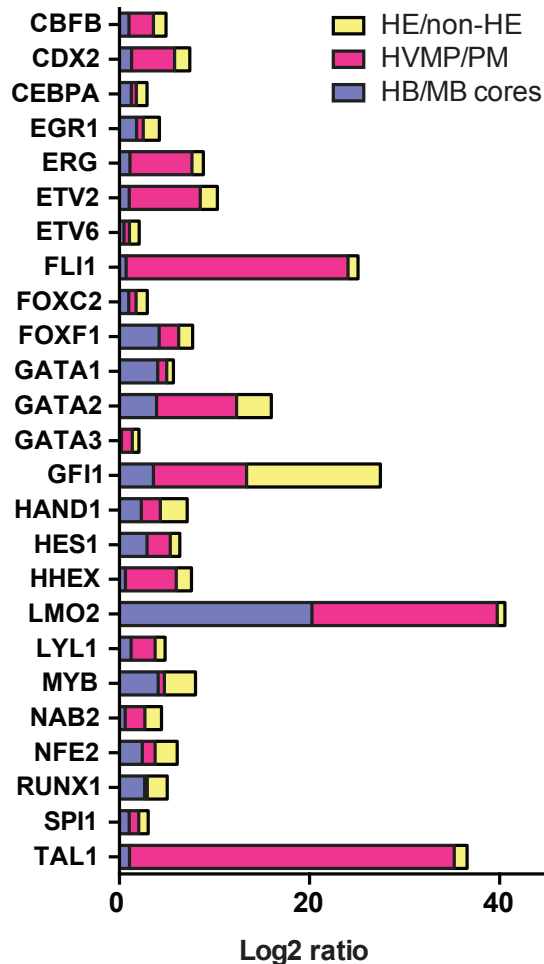

**Supplementary Figure 1. Prioritization of TFs for hematopoietic programming.** TFs enriched in hESC-derived mesodermal and endothelial cells with hematopoietic activity<sup>1,2</sup>. Bars represent a ratio of TF expression from molecular profiling studies of indicated subpopulations obtained from hESCs differentiated in coculture with OP9. HE is VE-cadherin<sup>+</sup>CD43<sup>-</sup>CD73<sup>-</sup> hemogenic endothelium; non-HE (VE-cadherin<sup>+</sup>CD43<sup>-</sup>CD73<sup>+</sup> non-hemogenic endothelium); PM is apelin receptor positive primitive mesodermal cells with hemangioblast potential generated on day 3 hESC/OP9 coculture; HVMP is hematovascular mesodermal precursor highly enriched in cells forming hematoendothelial clusters on OP9 isolated on day 4 of differentiation; HB is endothelial intermediates (cores) with hematopoietic activity formed in hemangioblast clonogenic cultures; MB is endothelial intermediates (cores) without hematopoietic activity formed in mesenchymoangioblast clonogenic cultures.

## Supplementary Figure 2

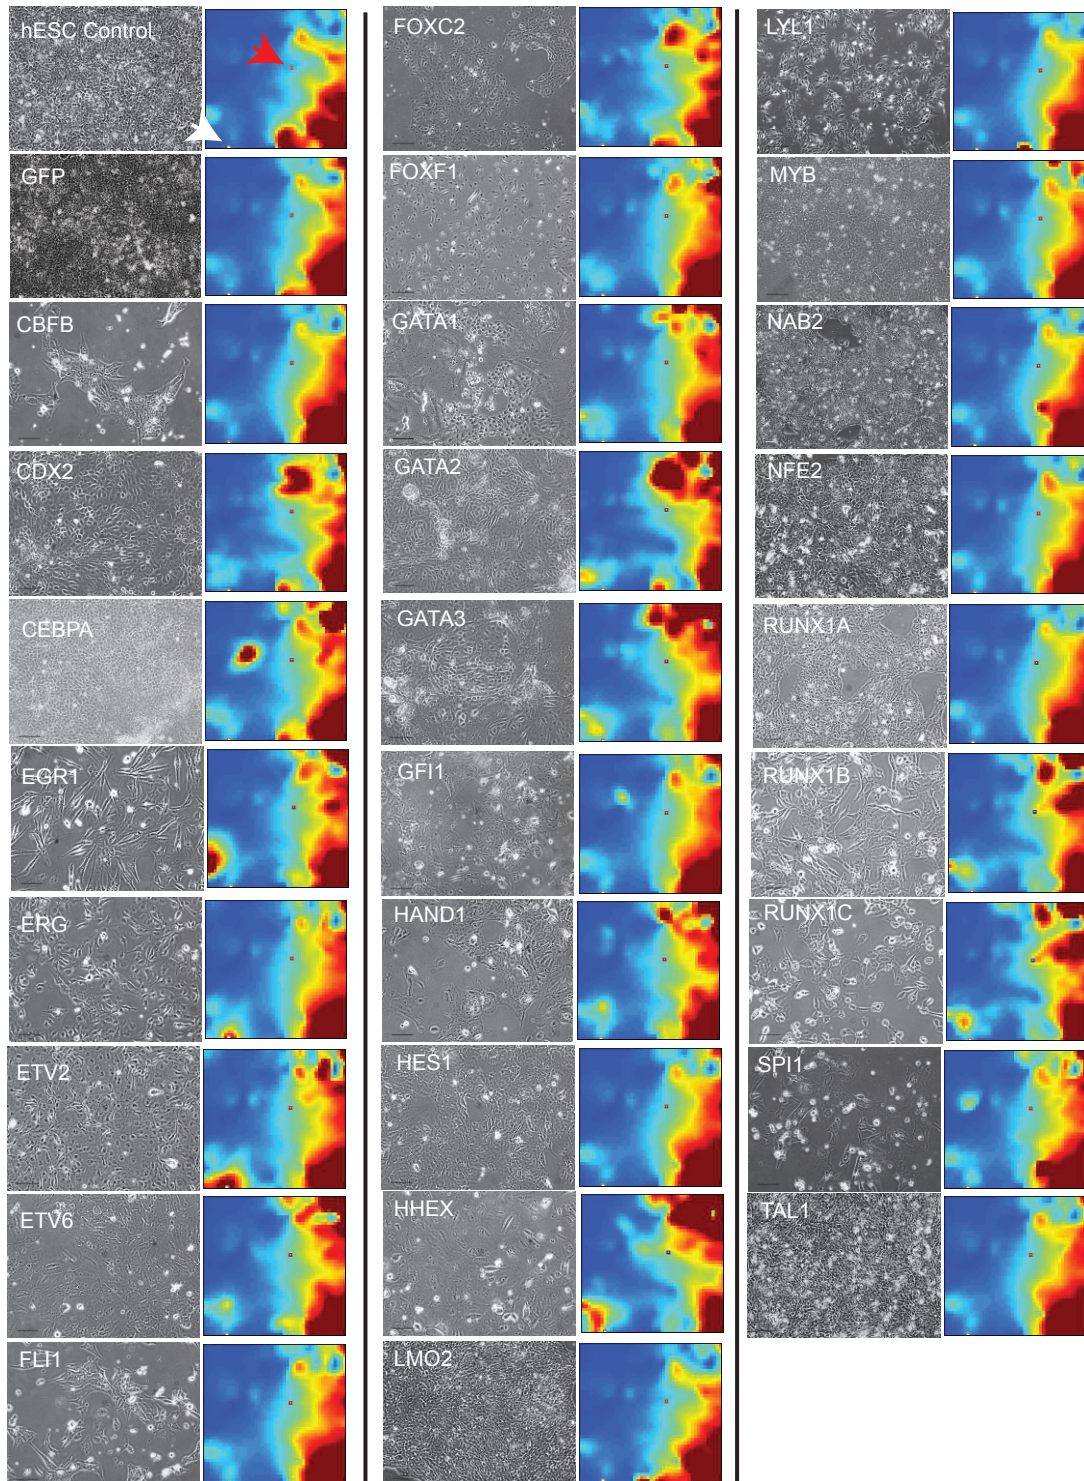

**Supplementary Figure 2. Morphologies and global gene expression profiles of hESCs differentiated by overexpression of single TF. Phase-contrast photographs of H1 hESCs**

cultures transduced with GFP or indicated transcription factor. Scale bar, 100 $\mu$ m. Global analysis of changes in gene expression profiles of lentivirally transduced hESCs represented using gene expression dynamic investigator GEDI<sup>3</sup>. Plot gradients from blue to red represents lowly to highly expressed genes. The red arrow shows the position of *RUNX1* and the white arrow shows the position of *CDH5*. Genes inducing significant changes in transcriptome alter map configuration (e.g. compare control and *GATA2*), while genes with minimal effect on transcriptome show little changes in map configuration (e.g. compare control and *TAL1*). Representative experiment of 2-5 experiments is shown. Only ERG and ETV2 induce significant *CDH5* expression. HHEX weakly upregulates *RUNX1* expression.



### Supplementary Figure 3

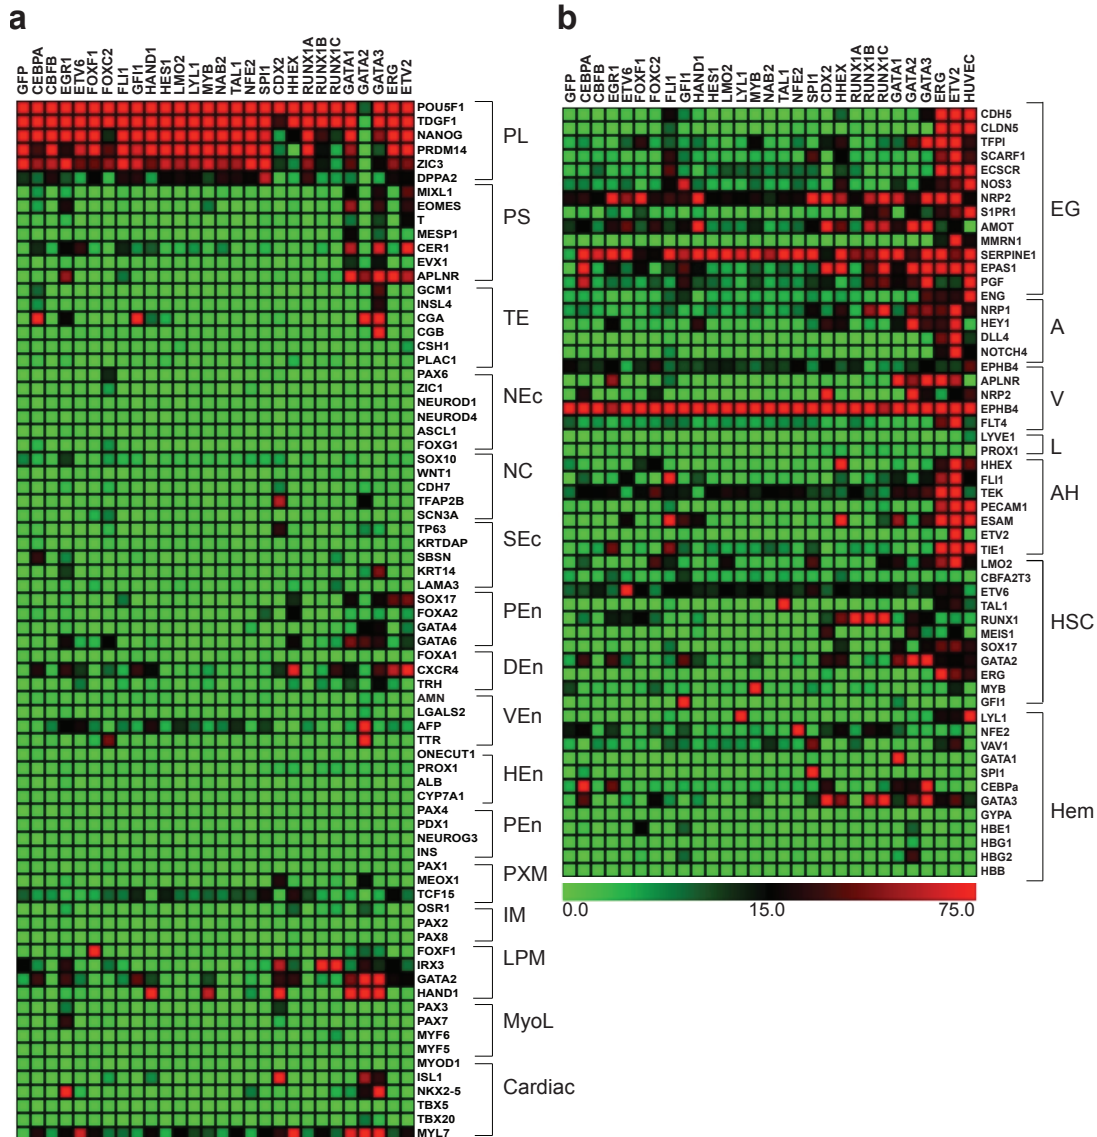

**Supplementary Figure 3. Gene expression profiling of H1 hESCs differentiated by overexpression of single transcription factor.** (a) Heat map of a selected set of genes associated with the development of germ layers and their derivatives. Pluripotency genes (PL); primitive streak (PS); trophoctoderm (TE); neuroectoderm (NEc); neural crest (NC); surface ectoderm (Sec); primitive endoderm (Pen); definitive endoderm (Den); visceral endoderm (VEn); hepatic endoderm (HEn); pancreatic endoderm (PEn); paraxial mesoderm (PXM); intermediate mesoderm (IM); lateral plate mesoderm (LPM); myogenic lineage (MyoL). (b) Heat map of selected sets of genes associated with endothelial and hematopoietic differentiation. Typical endothelial genes (EG); arterial (A); venous (V); lymphatic (L); angiohematopoietic (AH); hematopoietic stem cells (HSC); typical hematopoietic genes (Hem). ERG and ETV2 selectively induce the endothelial program while GATA2 downregulates expression of pluripotency genes. Gene expression is estimated in tpm values.

### Supplementary Figure 4

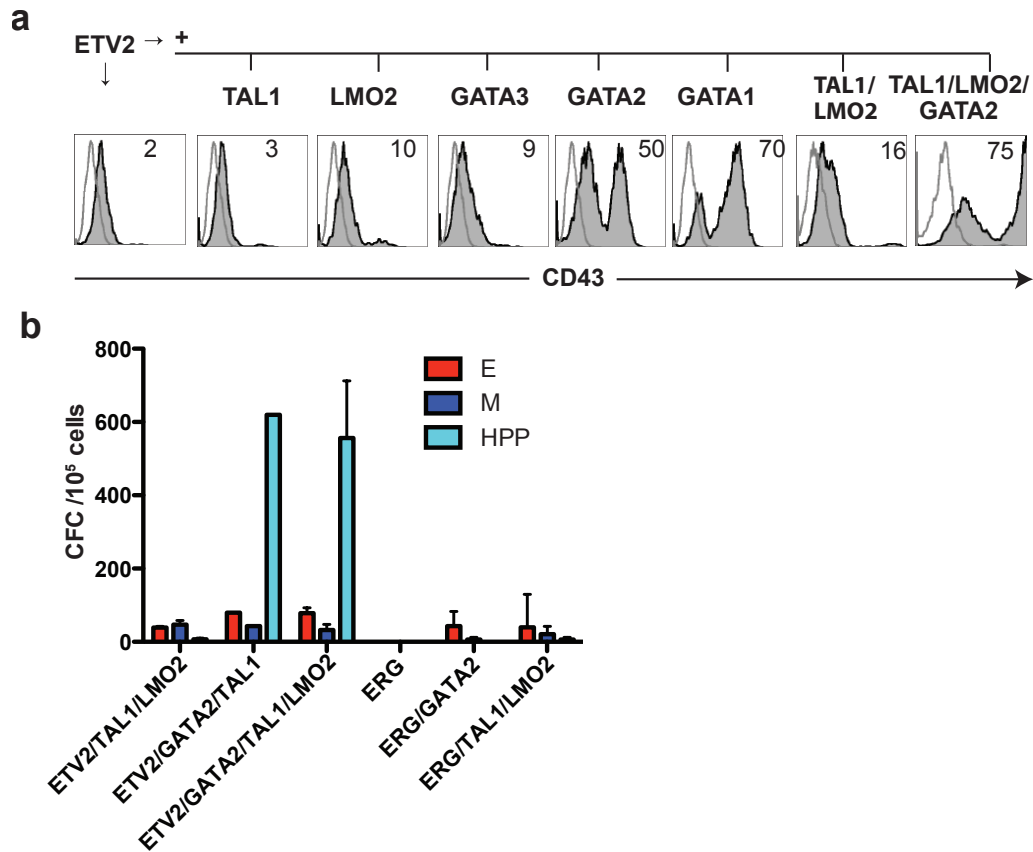

**Supplementary Figure 4. Screening of different combinations of TFs based on co-expression with ETV2 and ERG.** (a) CD43 expression by hESCs on day 7 after transduction with ETV2 plus indicated TFs. (b) CFC potential of hESCs transduced with indicated combinations of TFs. Results are mean for two to four independent experiments. Error bars shows s.e.m.

## Supplementary Figure 5

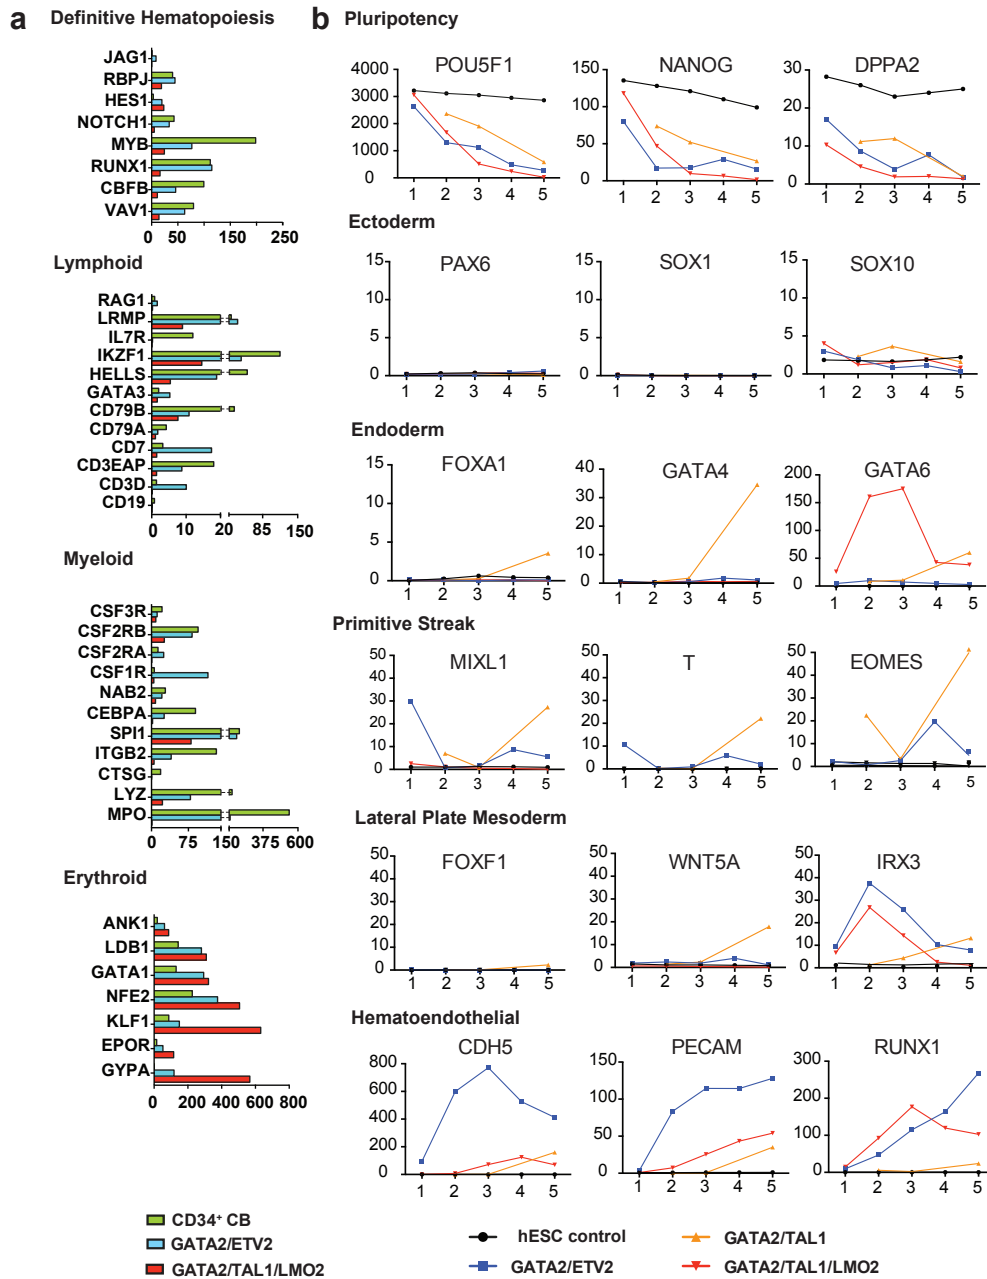

### Supplementary Figure 5. Analysis of gene expression in hESCs transduced with blood-inducing combinations of transcriptional regulators.

(a) The expression of genes associated with definitive hematopoiesis, lymphoid, myeloid, and erythroid specification in cells collected from hESCs cultures transduced with indicated combinations of factors. (b) Histograms comparing the kinetic of gene expression in control hESCs and hESCs transduced with indicated combinations of genes. Gene expression is estimated in tpm values

**Supplementary Table 1. List of selected genes**

|    | GENE                                                                                                                                       | SEQUENCE                       |
|----|--------------------------------------------------------------------------------------------------------------------------------------------|--------------------------------|
| 1  | <b>CBFB</b> Core-binding factor subunit beta (CBF-beta)                                                                                    | <a href="#">NM_001755.2</a>    |
| 2  | <b>CDX2</b> Caudal type homeobox 2                                                                                                         | <a href="#">NM_001265.4</a>    |
| 3  | <b>CEBAa</b> CCAAT/enhancer binding protein (C/EBP), alpha                                                                                 | <a href="#">BC160133.1</a>     |
| 4  | <b>EGR1</b> Early growth response 1                                                                                                        | <a href="#">NM_001964.2</a>    |
| 5  | <b>ERG</b> v-ets erythroblastosis virus E26 oncogene homolog                                                                               | <a href="#">NM_001243428.1</a> |
| 6  | <b>ETV2</b> ETS translocation variant 2                                                                                                    | <a href="#">NM_014209.2</a>    |
| 7  | <b>ETV6</b> ets variant 6                                                                                                                  | <a href="#">NM_001987.4</a>    |
| 8  | <b>FOXF1</b> Forkhead box F1                                                                                                               | <a href="#">NM_001451.2</a>    |
| 9  | <b>FOXC2</b> Forkhead box C2 (MFH-1, mesenchyme forkhead 1)                                                                                | <a href="#">BC113439.1</a>     |
| 10 | <b>FLI1</b> Friend leukemia virus integration 1                                                                                            | <a href="#">NM_002017.3</a>    |
| 11 | <b>GATA1</b> GATA binding protein 1                                                                                                        | <a href="#">NM_002049.3</a>    |
| 12 | <b>GATA2</b> GATA binding protein 2                                                                                                        | <a href="#">BC051342.1</a>     |
| 13 | <b>GATA3</b> GATA binding protein 3 trans-acting                                                                                           | <a href="#">BC003070.2</a>     |
| 14 | <b>GFI1</b> Growth factor independent 1 transcription repressor                                                                            | <a href="#">BC032751.1</a>     |
| 15 | <b>HAND1</b> Heart and neural crest derivatives expressed 1                                                                                | <a href="#">NM_004821.2</a>    |
| 16 | <b>HES1</b> Hairy and enhancer of split 1                                                                                                  | <a href="#">NM_005524.3</a>    |
| 17 | <b>HHEX</b> Hematopoietically expressed homeobox                                                                                           | <a href="#">NM_002729.4</a>    |
| 18 | <b>LMO2</b> LIM domain only 2 (rhombotin-like 1)                                                                                           | <a href="#">NM_001142315.1</a> |
| 19 | <b>LYL1</b> Lymphoblastic leukemia derived sequence 1                                                                                      | <a href="#">NM_005583.4</a>    |
| 20 | <b>MYB</b> v-myb myeloblastosis viral oncogene                                                                                             | <a href="#">BC064955.1</a>     |
| 21 | <b>NAB2</b> NGFI-A binding protein 2                                                                                                       | <a href="#">BC065931.1</a>     |
| 22 | <b>NFE2</b> Nuclear factor (erythroid-derived 2), 45kDa                                                                                    | <a href="#">BC005044.1</a>     |
| 23 | <b>RUNX1 isoform RUNX1A</b> Runt-related transcription factor 1 (RUNX1) transcript variant 3<br>Acute myeloid leukemia 1 protein isoform a | <a href="#">NM_001122607.1</a> |
| 24 | <b>RUNX1 isoform RUNX1B</b> Runt-related transcription factor 1 (RUNX1) transcript variant 2<br>Acute myeloid leukemia 1 protein isoform b | <a href="#">NM_001001890.2</a> |
| 25 | <b>RUNX1 isoform RUNX1C</b> Runt-related transcription factor 1 (RUNX1) transcript variant 1<br>Acute myeloid leukemia 1 protein isoform c | <a href="#">NM_001754.4</a>    |
| 26 | <b>SPI1</b> Spleen focus forming virus (SFFV) proviral integration oncogene spi1, PU-box binding protein (PU.1)                            | <a href="#">NM_003120.2</a>    |
| 27 | <b>TAL1/SCL</b> T-cell acute lymphocytic leukemia 1                                                                                        | <a href="#">NM_003189.2</a>    |

## Supplementary Table 2. Effect of individual transcription factors on cell morphology and phenotype

|    | Factor        | Change morphology | Early Cell Death | Markers by FACS** |     |      |      |      |      |      |      |
|----|---------------|-------------------|------------------|-------------------|-----|------|------|------|------|------|------|
|    |               |                   |                  | APLNR             | KDR | VEC  | CD31 | CD73 | CD34 | CD43 | CD45 |
| 1  | <b>CBFB</b>   | No                | No               | -                 | -   | -    | -    | -    | -    | -    | -    |
| 2  | <b>CDX2</b>   | Yes               | No               | -                 | -   | -    | -    | -    | -    | -    | -    |
| 3  | <b>CEBPA</b>  | Yes               | No               | -                 | -   | -    | -    | -    | -    | -    | -    |
| 4  | <b>EGR1</b>   | Yes               | No               | -                 | -   | -    | -    | -    | -    | -    | -    |
| 5  | <b>ERG</b>    | Yes               | No               | -                 | ++  | ++++ | ++++ | +++  | ++   | -    | -    |
| 6  | <b>ETV2</b>   | Yes               | No               | +                 | +++ | +++  | +++  | +++  | +++  | +    | +    |
| 7  | <b>ETV6</b>   | Yes               | No               | -                 | -   | -    | -    | -    | -    | -    | -    |
| 8  | <b>FOXF1</b>  | Yes               | Yes              | -                 | -   | -    | -    | ++   | +    | -    | -    |
| 9  | <b>FOXC2</b>  | Yes               | No               | -                 | -   | -    | -    | -    | -    | -    | -    |
| 10 | <b>FLI1</b>   | Yes               | Yes              | -                 | -   | -    | ++   | -    | -    | -    | -    |
| 11 | <b>GATA1</b>  | Yes               | No               | +                 | +   | -    | -    | +    | ++   | +    | -    |
| 12 | <b>GATA2</b>  | Yes               | No               | ++                | ++  | +    | +    | -    | ++   | +    | -    |
| 13 | <b>GATA3</b>  | Yes               | No               | +                 | +   | -    | -    | -    | ++   | -    | -    |
| 14 | <b>GFI1</b>   | Yes               | No               | -                 | -   | -    | -    | -    | -    | -    | -    |
| 15 | <b>HAND1</b>  | Yes               | No               | -                 | -   | +    | +    | ++   | -    | -    | -    |
| 16 | <b>HES1</b>   | No                | No               | -                 | -   | -    | -    | -    | -    | -    | -    |
| 17 | <b>HHEX</b>   | Yes               | No               | -                 | -   | -    | -    | -    | -    | -    | -    |
| 18 | <b>LMO2</b>   | No                | No               | -                 | -   | -    | -    | -    | -    | -    | -    |
| 19 | <b>LYL1</b>   | No                | No               | -                 | -   | -    | -    | -    | -    | -    | -    |
| 20 | <b>MYB</b>    | No                | No               | -                 | -   | -    | -    | -    | -    | -    | -    |
| 21 | <b>NAB2</b>   | No                | Yes              | -                 | -   | -    | -    | -    | -    | -    | -    |
| 22 | <b>NFE2</b>   | No                | No               | -                 | -   | -    | -    | -    | -    | -    | -    |
| 24 | <b>RUNX1A</b> | No                | Yes              | -                 | -   | +    | -    | +    | -    | -    | -    |
| 25 | <b>RUNX1B</b> | Yes               | Yes              | -                 | -   | +    | -    | +    | -    | -    | -    |
| 26 | <b>RUNX1C</b> | Yes               | Yes              | -                 | -   | +    | -    | +    | -    | -    | -    |
| 23 | <b>SPI1</b>   | Yes               | No               | -                 | -   | -    | -    | -    | -    | -    | +    |
| 27 | <b>TAL1</b>   | No                | No               | -                 | -   | -    | -    | -    | -    | -    | -    |

\* Cell death and morphologic changes were evaluated during 7 days of culture. Viable cell cultures collected on day 5 or 7 of culture. Cultures with cell death observed before 5 days of culture were collected and analyzed on 3<sup>rd</sup> day after transduction, i.e. before cell death was observed.

\*\*

| Symbol | Expression Levels | Positive cells (%) |
|--------|-------------------|--------------------|
| -      | Negative          | 0-1                |
| +      | Low               | 2-5                |
| ++     | Moderate          | 5- 20              |
| +++    | High              | 20-50              |
| ++++   | Very high         | > 50               |



**Supplementary Table 3. The efficiency of CD43<sup>+</sup> blood cell generation following transduction of hPSC with ETV2/GATA2 and GATA2/TAL1/LMO2 combinations**

| Cell line        | TFs Combination | Number of experiments ( <i>n</i> ) | Yield (10 <sup>6</sup> ) of CD43 <sup>+</sup> cells* | Method of hematopoietic programming |
|------------------|-----------------|------------------------------------|------------------------------------------------------|-------------------------------------|
| H1 hESC          | ETV2/GATA2      | 2                                  | 24.6                                                 | lentivirus                          |
| H9 hESC          | ETV2/GATA2      | 2                                  | 7.3                                                  | lentivirus                          |
| DF-19-9-7T hiPSC | ETV2/GATA2      | 2                                  | 14.5                                                 | lentivirus                          |
| DF-4-3-7T hiPSC  | ETV2/GATA2      | 1                                  | 2.7                                                  | lentivirus                          |
| H1 hESC          | ETV2/GATA2      | 1                                  | 11.6                                                 | mmRNA                               |
| H1 hESC          | GATA2/TAL1/LMO2 | 3                                  | 33.2                                                 | lentivirus                          |
| H9 hESC          | GATA2/TAL1/LMO2 | 2                                  | 18.8                                                 | lentivirus                          |
| DF-19-9-7T hiPSC | GATA2/TAL1/LMO2 | 2                                  | 13.6                                                 | lentivirus                          |
| DF-4-3-7T hiPSC  | GATA2/TAL1/LMO2 | 1                                  | 5.0                                                  | lentivirus                          |

\*Yield was calculated as a total number of CD43<sup>+</sup> cells obtained from 10<sup>6</sup> hPSCs after transduction with indicated combination of TFs and seven day of expansion in suspension cultures. To initiate blood formation, TFs were overexpressed in hPSCs using lentiviral vectors or mmRNA. After seven days, cells were collected and expanded for another seven days as described in materials and methods. Results show data from one experiment or mean of 2 or more experiments.

**Supplementary Table 4. List of antibodies used in the study**

| Antigen                     | Label       | Company          | Cat. Number | Application | Dilution  |
|-----------------------------|-------------|------------------|-------------|-------------|-----------|
| Mouse IgG k Isotype control | FITC        | BD Biosciences   | 554679      | FACS        | 1/20      |
| Mouse IgG k Isotype control | PE          | BD Biosciences   | 554680      | FACS        | 1/20      |
| Mouse IgG k Isotype control | APC         | BD Biosciences   | 554681      | FACS        | 1/20      |
| Anti-human CD29             | FITC        | Caltag-Invirogen | CD2901      | FACS        | 1/50      |
| Anti-human CD29             | PE          | Caltag-Invirogen | CD2904      | FACS        | 1/50      |
| Anti-human Tra-1-85         | APC         | R&D Systems      | FAB3195A    | FACS        | 1/10      |
| Anti-human Tra-1-81         | PE          | Stemgent         | 09-0012     | FACS        | 1/10      |
| Anti-human Tra-1-60         | PE          | Stemgent         | 09-0009     | FACS        | 1/10      |
| Anti-human SSEA-3           | PE          | Stemgent         | 09-0044     | FACS        | 1/10      |
| Anti-human SSEA-4           | PE          | Stemgent         | 09-0003     | FACS        | 1/10      |
| IgG rabbit                  | None        | EMD Millipore    | NI01-100UG  | IF          | 1 µg/ml   |
| IgG mouse                   | None        | EMD Millipore    | NI03-100UG  | IF          | 0.5 µg/ml |
| Anti-mouse/human REX1       | None        | Stemgent         | 09-0019     | IF          | 1/100     |
| Anti-mouse/human OCT4       | None        | Stemgent         | 09-0023     | IF          | 1/100     |
| Anti-mouse/human SOX2       | None        | Stemgent         | 09-0024     | IF          | 1/100     |
| Rabbit anti-human VEC       | None        | BenderMedSystem  | BMS158      | IF          | 1 µg/ml   |
| Mouse anti-human CD43       | None        | BD Biosciences   | 551457      | IF          | 0.5 µg/ml |
| Donkey Anti-mouse IgG       | DyLight 594 | JacksonResearch  | 715-516-150 | IF          | 2 µg/ml   |
| Donkey Anti-rabbit IgG      | DyLight 488 | JacksonResearch  | 715-486-152 | IF          | 2 µg/ml   |
| Anti-human APLNR (APJ)      | APC         | R&D Systems      | FAB856A     | FACS        | 1/30      |
| Anti-human CD31             | FITC        | BD Biosciences   | 555445      | FACS        | 1/20      |
| Anti-human CD31             | PE          | BD Biosciences   | 555446      | FACS        | 1/20      |
| Anti-human CD32             | PE          | BD Biosciences   | 552884      | FACS        | 1/20      |
| Anti-human CD34             | FITC        | BD Biosciences   | 555821      | FACS        | 1/20      |
| Anti-human CD34             | PE          | BD Biosciences   | 348057      | FACS        | 1/20      |
| Anti-human CD41a            | PE          | BD Biosciences   | 555467      | FACS        | 1/20      |
| Anti-human CD41a            | APC         | BD Biosciences   | 559777      | FACS        | 1/20      |
| Anti-human CD43             | FITC        | BD Biosciences   | 55475       | FACS        | 1/20      |
| Anti-human CD43             | PE          | BD Biosciences   | 560199      | FACS        | 1/20      |
| Anti-human CD43             | APC         | BD Biosciences   | 560198      | FACS        | 1/20      |
| Anti-human CD45             | APC         | BD Biosciences   | 555485      | FACS        | 1/20      |
| Anti-human CD66b            | FITC        | Pellicluster     | M1594       | FACS        | 1/20      |
| Anti-human CD73             | APC         | R&D Systems      | FAB5795A    | FACS        | 1/20      |
| Anti-human CD144            | FITC        | BD Biosciences   | 560411      | FACS        | 1/20      |
| Anti-human CD163            | PE          | R&D Systems      | FAB1607P    | FACS        | 1/20      |
| Anti-human CD226            | PE          | BD Biosciences   | 338305      | FACS        | 1/20      |
| Anti-human CD235a           | PE          | BD Biosciences   | 555570      | FACS        | 1/50      |
| Anti-human CD235a           | APC         | BD Biosciences   | 561775      | FACS        | 1/50      |

## Supplementary References

- 1 Choi, K. D. *et al.* Identification of the hemogenic endothelial progenitor and its direct precursor in human pluripotent stem cell differentiation cultures. *Cell Rep* 2, (2012).
- 2 Vodyanik, M. A. *et al.* A mesoderm-derived precursor for mesenchymal stem and endothelial cells. *Cell Stem Cell* 7, 718-729, (2010).
- 3 Eichler, G. S., Huang, S. & Ingber, D. E. Gene Expression Dynamics Inspector (GEDI): for integrative analysis of expression profiles. *Bioinformatics* 19, 2321-2322 (2003).
